# Supplementary material for: Cholesterol-rich naked mole-rat brain lipid membranes are susceptible to amyloid beta-induced damage in vitro
Source: publisher site journal article supplement (doi:10.18632/aging.202138), 2020-11-02
Supplement: Supplementary file [file aging-v12i21-202138-supplementary-material-SD3.pdf]

## SUPPLEMENTARY TABLES

**Supplementary Table 1. percentage of phosphatidylcholine from mouse and naked mole rat brains.**

| % of total phosphatidylcholine |                |                |         |
|--------------------------------|----------------|----------------|---------|
| Lipid number                   | Naked mole rat | Mouse          | P value |
| PC 28:0                        | 0.87 ± 0.12    | 0.021 ± 0.003  | 0.0012  |
| PC 30:0                        | 8.80 ± 0.78    | 0.91 ± 0.10    | 0.0012  |
| PC 30:1                        | 2.70 ± 1.04    | 0.59 ± 0.26    | 0.2343  |
| PC 32:0                        | 22.04 ± 0.55   | 32.98 ± 0.58   | 0.0012  |
| PC 32:1                        | 5.00 ± 0.86    | 1.08 ± 0.24    | 0.0012  |
| PC 32:2                        | 0.14 ± 0.007   | 0.008 ± 0.0007 | 0.0012  |
| PC 34:0                        | 2.90 ± 0.09    | 3.41 ± 0.10    | 0.0082  |
| PC 34:1                        | 18.45 ± 0.61   | 17.67 ± 0.44   | 0.4452  |
| PC 34:2                        | 1.50 ± 0.10    | 0.66 ± 0.02    | 0.0012  |
| PC 34:3                        | 0.15 ± 0.01    | 0.02 ± 0.001   | 0.0012  |
| PC 36:1                        | 4.19 ± 0.09    | 7.68 ± 0.08    | 0.0012  |
| PC 36:2                        | 2.57 ± 0.19    | 2.98 ± 0.17    | 0.1014  |
| PC 36:3                        | 1.51 ± 0.06    | 1.20 ± 0.03    | 0.0012  |
| PC 36:4                        | 6.47 ± 0.12    | 5.69 ± 0.08    | 0.0012  |
| PC 38:2                        | 0.21 ± 0.02    | 0.50 ± 0.01    | 0.0012  |
| PC 38:3                        | 1.21 ± 0.02    | 1.07 ± 0.01    | 0.0012  |
| PC 38:4                        | 7.83 ± 0.35    | 6.93 ± 0.25    | 0.1375  |
| PC 38:5                        | 3.70 ± 0.10    | 2.43 ± 0.33    | 0.0012  |
| PC 38:6                        | 3.98 ± 0.05    | 5.68 ± 0.20    | 0.0012  |
| PC 40:3                        | 0.097 ± 0.002  | 0.08 ± 0.002   | 0.0140  |
| PC 40:6                        | 5.64 ± 0.07    | 8.35 ± 0.26    | 0.0012  |

Values are expressed as mean ± SEM; Statistical analysis was performed using Mann-Whitney test.

**Supplementary Table 2. percentage of phosphatidylethanolamine from mouse and naked mole rat brains.**

| % of total phosphatidylethanolamine |                |               |         |
|-------------------------------------|----------------|---------------|---------|
| Lipid number                        | Naked mole rat | Mouse         | P value |
| PE 32:0                             | 0.50 ± 0.01    | 0.39 ± 0.03   | 0.0140  |
| PE 32:1                             | 0.56 ± 0.07    | 0.18 ± 0.02   | 0.0012  |
| PE 32:2                             | 0.040 ± 0.004  | 0.007 ± 0.001 | 0.0012  |
| PE 34:0                             | 8.88 ± 1.12    | 8.39 ± 1.02   | 0.2343  |
| PE 34:1                             | 1.04 ± 0.15    | 0.57 ± 0.06   | 0.0221  |
| PE 36:1                             | 8.46 ± 0.64    | 14.50 ± 0.40  | 0.0012  |
| PE 36:2                             | 4.71 ± 0.76    | 7.32 ± 0.88   | 0.0350  |
| PE 36:3                             | 1.77 ± 0.11    | 1.31 ± 0.16   | 0.1014  |
| PE 36:4                             | 1.79 ± 0.09    | 1.42 ± 0.07   | 0.0140  |
| PE 38:2                             | 1.83 ± 0.17    | 1.90 ± 0.10   | 0.9452  |
| PE 38:3                             | 13.78 ± 2.55   | 8.26 ± 1.77   | 0.1014  |
| PE 38:4                             | 16.55 ± 0.22   | 11.46 ± 0.22  | 0.0012  |
| PE 38:5                             | 3.81 ± 0.43    | 5.25 ± 0.54   | 0.1014  |
| PE 38:6                             | 4.40 ± 0.24    | 4.77 ± 0.53   | 0.9452  |
| PE 40:3                             | 3.57 ± 0.65    | 1.96 ± 0.38   | 0.1014  |
| PE 40:5                             | 12.14 ± 1.35   | 13.0 ± 2.26   | 0.7308  |
| PE 40:6                             | 14.60 ± 1.66   | 17.85 ± 1.80  | 0.1014  |
| PE 40:7                             | 1.55 ± 0.30    | 1.42 ± 0.26   | 0.2343  |

Values are expressed as mean ± SEM; Statistical analysis was performed using Mann-Whitney test.

**Supplementary Table 3. percentage of phosphatidylinositol from mouse and naked mole rat brains.**

| Lipid number | % of total phosphatidylinositol |               | P value |
|--------------|---------------------------------|---------------|---------|
|              | Naked mole rat                  | Mouse         |         |
| PI 32:1      | 0.19 ± 0.02                     | 0.147 ± 0.008 | 0.1014  |
| PI 34:1      | 1.40 ± 0.19                     | 2.08 ± 0.06   | 0.0350  |
| PI 34:2      | 0.39 ± 0.07                     | 0.38 ± 0.02   | 0.4452  |
| PI 36:0      | 0.24 ± 0.02                     | 0.66 ± 0.04   | 0.0012  |
| PI 36:1      | 0.81 ± 0.09                     | 2.10 ± 0.07   | 0.0012  |
| PI 36:2      | 0.67 ± 0.08                     | 0.90 ± 0.02   | 0.1807  |
| PI 36:3      | 2.36 ± 0.11                     | 2.58 ± 0.20   | 0.4452  |
| PI 38:1      | 0.10 ± 0.01                     | 0.285 ± 0.008 | 0.0012  |
| PI 38:2      | 1.02 ± 0.04                     | 1.04 ± 0.05   | 0.7308  |
| PI 38:3      | 18.49 ± 1.08                    | 17.34 ± 1.04  | 0.1375  |
| PI 38:4      | 55.34 ± 0.38                    | 52.74 ± 0.27  | 0.0012  |
| PI 38:5      | 16.58 ± 0.87                    | 14.51 ± 0.99  | 0.2343  |
| PI 40:2      | 0.026 ± 0.001                   | 0.032 ± 0.008 | 0.9452  |
| PI 40:3      | 0.118 ± 0.003                   | 0.159 ± 0.007 | 0.0012  |
| PI 40:4      | 0.377 ± 0.009                   | 0.51 ± 0.01   | 0.0012  |
| PI 40:5      | 0.73 ± 0.05                     | 1.39 ± 0.05   | 0.0012  |
| PI 40:6      | 1.16 ± 0.15                     | 3.13 ± 0.15   | 0.0012  |

Values are expressed as mean ± SEM; Statistical analysis was performed using Mann-Whitney test.

**Supplementary Table 4. percentage of phosphatidylserine from mouse and naked mole rat brains.**

| Lipid number | % of total phosphatidylserine |               | P value |
|--------------|-------------------------------|---------------|---------|
|              | Naked mole rat                | Mouse         |         |
| PS 32:0      | 0.027 ± 0.001                 | 0.011 ± 0.001 | 0.0023  |
| PS 34:0      | 0.57 ± 0.02                   | 0.48 ± 0.01   | 0.0047  |
| PS 34:1      | 2.37 ± 0.12                   | 1.58 ± 0.02   | 0.0012  |
| PS 34:2      | 0.19 ± 0.01                   | 0.091 ± 0.002 | 0.0012  |
| PS 36:0      | 2.03 ± 0.16                   | 3.27 ± 0.08   | 0.0012  |
| PS 36:1      | 6.66 ± 0.36                   | 12.22 ± 0.37  | 0.0012  |
| PS 36:2      | 3.32 ± 0.14                   | 4.88 ± 0.16   | 0.0012  |
| PS 36:3      | 0.345 ± 0.007                 | 0.188 ± 0.003 | 0.0012  |
| PS 38:2      | 0.74 ± 0.03                   | 0.86 ± 0.04   | 0.0350  |
| PS 38:3      | 2.57 ± 0.10                   | 1.84 ± 0.06   | 0.0023  |
| PS 38:4      | 5.29 ± 0.07                   | 3.71 ± 0.13   | 0.0012  |
| PS 38:6      | 0.38 ± 0.04                   | 0.61 ± 0.06   | 0.0221  |
| PS 40:5      | 23.33 ± 0.43                  | 18.02 ± 0.21  | 0.0012  |
| PS 40:6      | 51.91 ± 0.43                  | 52.01 ± 0.32  | 0.5338  |
| PS 42:6      | 0.263 ± 0.009                 | 0.23 ± 0.01   | 0.1807  |

Values are expressed as mean ± SEM; Statistical analysis was performed using Mann-Whitney test.

**Supplementary Table 5. percentage of sphingomyelin from mouse and naked mole rat brains.**

| Lipid number | % of total sphingomyelin |               | P value |
|--------------|--------------------------|---------------|---------|
|              | Naked mole rat           | Mouse         |         |
| SM 18:1/14:0 | 1.95 ± 0.07              | 0.113 ± 0.008 | 0.0012  |
| SM 18:1/16:0 | 20.05 ± 0.95             | 4.16 ± 0.18   | 0.0012  |
| SM 18:1/16:1 | 0.46 ± 0.05              | 0.131 ± 0.009 | 0.0012  |
| SM 18:1/18:0 | 58.86 ± 0.68             | 68.62 ± 1.05  | 0.0012  |
| SM 18:1/18:1 | 5.46 ± 0.54              | 5.79 ± 0.39   | 0.9452  |
| SM 18:1/20:0 | 1.61 ± 0.14              | 2.53 ± 0.31   | 0.0734  |
| SM 18:1/20:1 | 0.150 ± 0.009            | 0.35 ± 0.02   | 0.0012  |
| SM 18:1/22:0 | 1.08 ± 0.18              | 1.54 ± 0.16   | 0.1014  |
| SM 18:1/22:1 | 0.56 ± 0.05              | 0.83 ± 0.13   | 0.2949  |
| SM 18:1/24:0 | 2.83 ± 0.33              | 3.03 ± 0.11   | 0.7308  |
| SM 18:1/24:1 | 6.98 ± 0.77              | 12.90 ± 0.52  | 0.0012  |

Values are expressed as mean ± SEM; Statistical analysis was performed using Mann-Whitney test.

**Supplementary Table 6. percentage of ceramide from mouse and naked mole rat brains.**

| Lipid number   | % of total ceramide |               | P value |
|----------------|---------------------|---------------|---------|
|                | Naked mole rat      | Mouse         |         |
| Cer d18:1/16:0 | 12.39 ± 0.66        | 1.99 ± 0.06   | 0.0012  |
| Cer d18:1/16:1 | 0.087 ± 0.003       | 0.018 ± 0.001 | 0.0012  |
| Cer d18:1/18:0 | 77.92 ± 0.38        | 85.18 ± 1.70  | 0.0012  |
| Cer d18:1/18:1 | 1.15 ± 0.07         | 0.91 ± 0.09   | 0.1375  |
| Cer d18:1/20:0 | 0.76 ± 0.03         | 3.40 ± 0.08   | 0.0012  |
| Cer d18:1/22:0 | 1.11 ± 0.06         | 1.35 ± 0.10   | 0.1014  |
| Cer d18:1/24:0 | 3.06 ± 0.44         | 3.12 ± 0.71   | >0.9999 |
| Cer d18:1/24:1 | 3.45 ± 0.47         | 3.97 ± 0.99   | 0.8357  |
| Cer d18:1/26:0 | 0.033 ± 0.008       | 0.023 ± 0.008 | 0.2343  |
| Cer d18:1/26:1 | 0.038 ± 0.007       | 0.022 ± 0.006 | 0.1014  |

Values are expressed as mean ± SEM; Statistical analysis was performed using Mann-Whitney test.

**Supplementary Table 7. Relative concentration of fatty acid from mouse and naked mole rat brains.**

| Common name             | Lipid number | Relative concentration per g of tissue |                | P value |
|-------------------------|--------------|----------------------------------------|----------------|---------|
|                         |              | Mouse                                  | Naked mole rat |         |
| Myristic acid           | C14:0        | 0.84 ± 0.08                            | 2.53 ± 0.19    | 0.0025  |
| Palmitic acid           | C16:0        | 0.73 ± 0.02                            | 1.14 ± 0.05    | 0.0012  |
| Stearic acid            | C18:0        | 670.90 ± 69.27                         | 526.00 ± 33.00 | 0.1375  |
| Hypogeic acid           | C16:1 n-9    | 3.03 ± 0.50                            | 17.90 ± 2.14   | 0.0012  |
| Palmitoleic acid        | C16:1 n-7    | 8.62 ± 1.25                            | 11.00 ± 1.13   | 0.2774  |
| Elaidic acid            | C18:1 n-9    | 540.60 ± 59.06                         | 425.70 ± 21.36 | 0.1807  |
| Vaccenic acid           | C18:1 n-7    | 117.50 ± 13.06                         | 110.20 ± 5.10  | 0.6282  |
| Gondoic acid            | C20:1 n-9    | 75.29 ± 11.01                          | 35.49 ± 6.50   | 0.0140  |
| Linoleic acid           | C18:2 n-6    | 20.48 ± 2.86                           | 22.66 ± 2.13   | 0.8357  |
| α-Linolenic acid        | C18:3 n-3    | 0.87 ± 0.14                            | 0.87 ± 0.14    | 0.9452  |
| Eicosadienoic acid      | C20:2 n-6    | 8.77 ± 1.09                            | 9.39 ± 1.03    | 0.7308  |
| Dihomo-γ-linolenic acid | C20:3 n-6    | 19.39 ± 2.25                           | 21.26 ± 1.79   | 0.5589  |
| Arachidonic acid        | C20:4 n-6    | 353.40 ± 42.06                         | 360.10 ± 29.88 | 0.8357  |
| Eicosapentaenoic acid   | C20:5 n-3    | 1.11 ± 0.15                            | 5.40 ± 0.89    | 0.0012  |
| Docosatrienoic acid     | C22:3 n-3    | 7.81 ± 1.17                            | 24.20 ± 3.36   | 0.0023  |
| Adrenic acid            | C22:4 n-6    | 89.30 ± 11.63                          | 93.05 ± 10.27  | 0.9999  |
| Docosapentaenoic acid   | C22:5 n-3    | 11.77 ± 2.09                           | 38.43 ± 3.11   | 0.0012  |
| Docosahexaenoic acid    | C22:6 n-3    | 660.00 ± 88.74                         | 382.30 ± 1.67  | 0.0221  |

Values are expressed as mean ± SEM; Statistical analysis was performed using Mann-Whitney test.
